1 **Human leukocyte antigen class II gene diversity tunes antibody repertoires**  
2 **to common pathogens**

3

4 Taushif Khan<sup>1,\*</sup>, Mahbuba Rahman<sup>1,\*,\$</sup>, Ikhlaq Ahmed<sup>1</sup>, Fatima Al Ali<sup>1</sup>, Puthen Jithesh<sup>1,2</sup>,

5 Nico Marr<sup>1,2,#</sup>

6 1. Research Branch, Sidra Medicine, Doha, Qatar

7 2. College of Health and Life Sciences, Hamad Bin Khalifa University, Doha, Qatar

8

9 bioRxiv version 1 (January 11, 2021)

10

11 **Short title:** HLA II diversity and antibody repertoire

12

13 **Key words:** Human antibody repertoires, microbial infection, phage immunoprecipitation-  
14 sequencing, human leukocyte antigen, major histocompatibility complex, polymorphisms,  
15 allelic diversity, association study

16

17 **Footnotes:**

18 \*These authors contributed equally.

19 \$Current address: Biomedical Research Center, Qatar University, Doha, Qatar

20 #Address correspondence to: Nico Marr, Sidra Medicine, Research Branch, Doha, Qatar, PO  
21 BOX 26999, E-mail: [nmarr@sidra.org](mailto:nmarr@sidra.org)

22

23

24 **Abstract**

25 Allelic diversity of HLA class II genes may help maintain humoral immunity against infectious  
26 diseases. We investigated the relative contribution of specific HLA class II alleles, haplotypes  
27 and genotypes on the variation of antibody responses to a variety of common pathogens in a  
28 cohort of 800 adults representing the general Arab population. We found that classical HLA  
29 class II gene heterozygosity confers a selective advantage. Moreover, we demonstrated that  
30 multiple HLA class II alleles play a synergistic role in shaping the antibody repertoire.  
31 Interestingly, associations of HLA-DRB1 genotypes with specific antigens were identified.  
32 Our findings suggest that HLA class II gene polymorphisms confer specific humoral immunity  
33 against common pathogens, which may have contributed to the genetic diversity of HLA class  
34 II loci during hominine evolution.

## 35 **Introduction**

36 Originally discovered as the genetic loci responsible for rapid graft rejection, the classical  
37 major histocompatibility complex class I (*MHC-I*) and II (*MHC-II*) genes encode glycoproteins  
38 responsible for antigen presentation, allowing the immune systems of all jawed vertebrates to  
39 discriminate between self and non-self molecules. In humans, the classical *MHC* genes are  
40 located with functionally related genes on chromosome region 6p21.3; this cluster of genes is  
41 referred to as the human leucocyte antigen (HLA) gene complex (*I*). HLA class I glycoproteins  
42 are ubiquitously expressed, contain the functional sites that primarily bind endogenous peptides  
43 and contribute to innate immunity by engaging natural killer cell receptors, and to adaptive  
44 cellular immunity, through the engagement of the  $\alpha\beta$  antigen receptors on cytotoxic (CD8<sup>+</sup>) T  
45 cells. In contrast, the HLA class II glycoproteins, HLA-DR, -DP and -DQ, are expressed  
46 exclusively by antigen presenting cells. These molecules contribute to adaptive immunity by  
47 presenting exogenous peptides and engage with the  $\alpha\beta$  antigen receptors of helper (CD4<sup>+</sup>) T  
48 cells, which in turn participate in the activation of naïve B cells (*I*). Thus, the HLA class II  
49 glycoproteins play an indirect but critical role in antibody responses to thymus-dependent  
50 antigens. Normally, the peptides presented by the HLA class I and II glycoproteins are derived  
51 from host proteins that do not elicit any immune responses due to the elimination of self-  
52 reactive T cells during their development in the thymus. This process is orchestrated by the  
53 interaction of immature T cells with a variety of thymic cell types. However, following  
54 infection or in cancer cells, the binding of non-self (pathogen or mutated) peptides by the HLA  
55 glycoproteins leads to the activation of naïve or memory T cells (2, 3).

56

57 In comparison to most other human genes, the classical HLA loci are extremely polymorphic  
58 as a consequence of pathogen-driven balancing selection pressure over prolonged time periods.  
59 Some of these polymorphisms were shown to precede the speciation of modern humans (*i.e.*

60 trans-species polymorphisms), or were introduced into the human gene pool by admixture  
61 between archaic and modern humans (*i.e.* adaptive introgression) (1, 4, 5). To date, more than  
62 25,000 HLA allele sequences have been identified (6). Variation is highest at sites that define  
63 the peptide-binding repertoire (5). Multiple selection mechanisms have been proposed to  
64 underly this extraordinarily high level of genetic diversity of classical HLA loci, including  
65 negative frequency-dependent selection (also referred to as rare allele advantage), heterozygote  
66 advantage, and fluctuating selection, none of which are mutually exclusive (1, 5). Nevertheless,  
67 providing empirical evidence for the underlying selection mechanisms through human studies  
68 and evaluating their relative contribution to HLA diversity have not been straightforward (5).  
69 Similarly, pinpointing causal variant-disease relationships (or causal variant-phenotype  
70 relationships) remains a challenge due to the synergistic effects of multiple HLA loci that have  
71 related functions, with each of the classical HLA loci on its own exhibiting a high degree of  
72 immunological redundancy, as well as due to the density and strong linkage disequilibrium  
73 (LD) of HLA genes (1, 4, 5, 7).

74

75 The functional effects of common polymorphisms in HLA loci or elsewhere in the human  
76 genome have mainly been inferred using an epidemiological study design, in which a group of  
77 selected cases with a study-defined disease or individuals with a specific immunological  
78 phenotype (*e.g.* a vaccine response or lack thereof) are compared to a group of controls to  
79 identify those polymorphisms and alleles that are statistically over-represented among either  
80 the case group (*i.e.* risk alleles) or the controls (*i.e.* protective alleles). Such studies have  
81 revealed associations of certain HLA class I gene polymorphisms with human  
82 immunodeficiency virus-type 1 (HIV-1) virus load and AIDS progression (8, 9). Associations  
83 have also been identified between HLA class II gene variants and chronic hepatitis B and C  
84 infections, leprosy and tuberculosis, or responses to influenza and hepatitis B vaccination,  
85 albeit most identified risk or protective alleles have only small-to-modest effect sizes.

86 Moreover, specific HLA alleles have been associated with a variety of autoimmune and  
87 inflammatory diseases (10). These associations highlight the delicate balance between the  
88 ability of the immune system to activate potent effector mechanisms against invading  
89 pathogens while preventing excessive host tissue damage (11).

90

91 Nevertheless, our current understanding of the inter-individual variation of the immune  
92 responses to microbial challenges remains limited. The relative contribution of different  
93 genetic and non-genetic factors driving this variation are only beginning to be unraveled using  
94 holistic (*i.e.* systems immunology) approaches applied to larger cohorts of either healthy  
95 individuals, or the general population of a given geographic region (or ethnicity). These  
96 approaches allow the dissection of gene-phenotype relationships underlying the enormous  
97 inter-individual differences in susceptibility to pathogens at a much higher resolution (12). To  
98 date, only a few studies have investigated the functional consequences of genetic variation in  
99 HLA class II genes on the variability of antibody responses in healthy individuals or the general  
100 population (13-15). Such studies have been hampered not only by the large number of different  
101 HLA class II alleles, the strong LD and the high immunological redundancy of individual HLA  
102 class II genes, but also the lack of cost-effective and technically feasible experimental  
103 approaches that enable the assessment of very large numbers of antibody-antigen interactions  
104 in sufficiently sized human cohorts.

105

106 In this study, we explored the relative contribution of specific HLA class II alleles, haplotypes  
107 and genotypes on the variation of human antibody responses to a variety of common human  
108 pathogens. We conducted an unbiased, large-scale, high-throughput screen of antigen-antibody  
109 interactions using phage-immunoprecipitation sequencing (PhIP-Seq) (16, 17) and samples  
110 from a well-defined cohort of 800 adult Qatari nationals and long-term residents of Qatar. This  
111 sample of the general population was expected to have limited genetic diversity and an excess

112 of individuals with HLA homozygosity due to high rates of consanguinity (18), thereby  
113 allowing us to overcome challenges related to the extreme allelic diversity of classical HLA  
114 class II loci.

## 115 **Results**

### 116 *HLA type inference from whole genome sequencing data of the 800 study participants*

117 Using a population reference graph (PRG) framework as described by Dilthey *et al.* (19), we  
118 determined the allelic state of the classical HLA class II genes in our study cohort of 800 Qatari  
119 nationals and long-term residents of Qatar based on whole genome sequencing data at 6-digit  
120 allelic resolution or higher (*i.e.* taking into account non-synonymous and synonymous single  
121 nucleotide variants in the protein-coding region of the classical HLA class II genes). As  
122 expected, *HLA-DRB1* was the most polymorphic gene among the HLA class II genes, with 49  
123 different alleles identified in our cohort, followed by *HLA-DPB1* (28 alleles), *HLA-DPA1* (22  
124 alleles) and *HLA-DQB1* (16 alleles). The most commonly present *DRB1* alleles ( $\geq 10\%$ ) were  
125 HLA-DRB1\*03:01:01 (15.81%), HLA-DRB1\*07:01:01, (15.06%) and HLA-DRB1\*16:02:01  
126 (10.50%). Of note, more than half of our study cohort shared one of two HLA-DRB1 alleles  
127 (HLA-DRB1\*03:01:01 and HLA-DRB1\*07:01:01). Interestingly, we also identified several  
128 null alleles in HLA-DRB1 heterozygotes of our study cohort, including HLA-DRB1\*15:13  
129 (allele frequency (AF) = 3.19%, n = 51) HLA-DRB1\*15:96 (AF = 0.88%, n = 14), HLA-  
130 DRB1\*07:10 (AF = 0.82%, n = 13) and four more rare HLA-DRB1 alleles (AF <0.2%, not  
131 shown). Table 1 lists all detected HLA class II alleles with an estimated AF of 0.5% or more  
132 in our study cohort. A multiple sequence alignment of the gene products of all HLA-DRB1  
133 alleles analyzed in this study is shown in Supplementary Figure S1. As expected, genetic  
134 variants in the class II loci were found to be in strong linkage disequilibrium (LD)  
135 (Supplementary Figure S2), *i.e.* the HLA class II alleles are strongly associated in the  
136 population and are inherited as haplotypes (Supplementary Table S1). Due to the high rates of  
137 consanguineous marriages in Qatar (20), we also assessed the existence of a significant  
138 deviation in the observed number HLA homozygotes for the classical class II alleles in our  
139 study cohort, assuming Hardy–Weinberg equilibrium. Indeed, excess homozygosity was found

140 for DRB3\*03:01:01G, DRB3\*01:01:02G and DRB3\*02:02:01G, which was consistent with  
141 the low fixation index (mean  $F = 0.0114$ ;  $SD = 0.04$ ), indicating that genetic material has been  
142 shared in this population through high levels of inbreeding. Intriguingly, we also found that  
143 homozygotes of HLA-DRB1\*07:01:01 were significantly underrepresented ( $P < 0.00001$ ) and  
144 completely absent in our study cohort, suggesting that this genotype is under negative selective  
145 pressure (Supplementary Table S2).

146

### 147 ***Characterization of antibody responses to common human pathogens***

148 Next, we performed PhIP-Seq (16, 17) on serum samples obtained from each individual ( $n =$   
149 800) of our study cohort at a single time-point (*i.e.*, at the time of recruitment by the Qatar  
150 Biobank study (18)). In brief, this technology enabled us to obtain a comprehensive profile of  
151 antibody repertoires in our study cohort using phage display of oligonucleotide-encoded  
152 peptides, followed by immunoprecipitation and massive parallel sequencing (16, 17). The  
153 VirScan phage library used for PhIP-Seq in the present study comprised peptide tiles of up to  
154 56 amino acids in length that overlap by 28 amino acids and collectively encompass the full  
155 proteomes of most known human-tropic viruses (approximately 400 species) plus many  
156 bacterial protein antigens (21). Using this technique, we identified the antibody repertoires of  
157 798 individuals; data from two individuals were excluded from the downstream analysis as  
158 these did not meet our stringent criteria for quality control (22). We also excluded antibody  
159 specificities to species for which we found the seroprevalence in the local adult population to  
160 be below 5% (for details see the Materials and Methods section). We retained antibody  
161 specificities against a total of 48 microbial species for our downstream analysis (Table 2). As  
162 expected, the majority of individuals were seropositive for antibodies against various human-  
163 tropic viruses that frequently cause upper respiratory tract infections (*i.e.* ‘common cold’  
164 viruses), and human herpesvirus (HHV) species, which commonly establish life-long persistent



165 infections (*i.e.* latency), as well as bacteria such as *Staphylococcus aureus*, *Streptococcus*  
166 *pneumoniae*, and *Mycoplasma pneumoniae*, which frequently colonize the skin or upper  
167 airways but that are typically innocuous. We also detected antibodies against human  
168 papillomaviruses (HPVs), which cause common warts, enteroviruses (EV) (*i.e.*, EV-A, -B and  
169 -C), rotavirus A and *Helicobacter pylori*, which can cause gastrointestinal disease, as well as  
170 antibody responses that are likely to reflect immunity from childhood vaccination (*e.g.* to  
171 smallpox and polio vaccine strains) (Table 2).

172

### 173 ***Impact of age and sex on the species-specific antibody responses***

174 Previous studies of the French *Milieu Interieur* cohort showed that age and sex are important  
175 non-genetic covariates underlying the inter-individual variability of human antibody responses  
176 to common pathogens among healthy individuals (15). We therefore included age and sex as  
177 covariates in the serological analysis of our cohort. We found the breadth of the antibody  
178 repertoire against HHV-5 to be significantly and positively associated with age [ $-\log_{10}(P \text{ value})$   
179  $\leq 6.48$ ;  $\beta = 1.36$ ; 95% CI: 0.94–1.86], whereas the antibody repertoire breadth against human  
180 rhinoviruses (HRV)-A and -B, EV-A, human adenovirus (HAdV)-C, HHV-6B and *S.*  
181 *pneumoniae* correlated negatively with increasing age. We also found the antibody repertoire  
182 breadth against influenza B virus (IBV) to be weakly associated with male, but not female sex,  
183 whereas the opposite was the case for the antibody repertoire breadth against HHV-8 and *H.*  
184 *pylori* (Supplementary Table S3).

185

### 186 ***Zygosity of classical HLA class II genes affects the antimicrobial antibody repertoire breadth***

187 Our study cohort included a small but sizable proportion of HLA-DRB1 homozygotes ( $n = 46$ )  
188 (Table 1). HLA diversity among these subjects was more limited at the individual level  
189 compared to that of the HLA heterozygotes, because these individuals inherited the same HLA-

190 DRB1 allele (as well as HLA haplotypes with low sequence divergence) from each parent.  
191 Consequently, they express fewer molecular variants of the HLA-DP, -DQ, and -DR  
192 heterodimers that present peptides to CD4<sup>+</sup> T cells. We therefore reasoned that HLA-DRB1  
193 homozygotes would also have a lower capacity for generating antibody responses against a  
194 broad spectrum of antigens than HLA-DRB1 heterozygotes, at least in response to some  
195 pathogens, and independent of the specific HLA alleles and haplotypes they have inherited. To  
196 account for the varying number of peptides and potential protein antigens for each microbial  
197 species encompassed by the phage display library, we adjusted the species-specific score  
198 values by normalizing the counts of significantly enriched, non-homologous peptides (*i.e.*  
199 pulled down peptides containing distinct linear B cell epitopes) against the total count of  
200 peptides for a given microbial species represented in the phage library, as described previously  
201 (22). We then used these adjusted species score values as a quantitative measure of the antibody  
202 repertoire breadth against each of the common microbial species identified, thereby allowing  
203 us to independently assess the effect of HLA-DRB1, -DPA1, -DPB1, -DQA1, -DQB1  
204 zygosity. We found a significant ( $P \leq 0.0001$ ) and positive ( $\beta \geq 0.68$ ) association between a  
205 heterozygous HLA-DRB1 genotype and the size of the antibody repertoires against HHV-4,  
206 HHV-5, HHV-6B, HRV-A, HRV-B and HAdV-C, as well as *S. aureus* and *S. pneumoniae*  
207 (Table 3). To account for the imbalance in the sample size for homozygous versus  
208 heterozygous individuals, we confirmed these findings using a bootstrapping method after  
209 randomly re-sampling (100 times) the same number of heterozygotes and HLA-DRB1  
210 homozygotes (Supplementary Figure 3).

211

212 ***HLA class II allele- and HLA-DQA1~DQB1~DRB1 haplotype-specific effects on the***  
213 ***antibody repertoire breadth against common microbial infections***

214 Given the pathogen-driven balancing selection and allelic diversity of classical HLA class II  
215 loci, particularly at sites that define the peptide-binding repertoire (5), we reasoned that  
216 classical HLA class II alleles and haplotypes should have varying effects on the repertoire  
217 breadth of antibodies detected in our study cohort, which may also differ depending on the  
218 microbial species. These microbial species, for which the variance in human antibody  
219 responses between individuals with different HLA class II alleles and haplotypes is greatest,  
220 may arguably also play an important role in driving allelic diversity of HLA class II genes in  
221 the first place. We tested for associations between specific HLA class II alleles and the antibody  
222 repertoire breadth against the common microbial species identified above by using the adjusted  
223 species score values as response variables and the HLA-DRB1 (n = 21), -DQB1 (n = 11), -  
224 DPB1 (n = 9), -DQA1 (n = 5) and -DPA1 (n = 5) alleles with an AF between 1% and 20% in  
225 our study cohort as explanatory variables. HLA-DRA alleles were excluded from the analysis  
226 as there are no polymorphisms of this gene in sequences encoding the peptide-binding grooves  
227 (1). We also excluded rare (AF <1%) as well as more common (AF >20%) HLA class II alleles  
228 found in our study cohort (i.e. HLA-DRB3 and -DRB4 alleles) to ensure homoscedasticity (not  
229 shown). Again, stringent criteria were applied to test for strong associations ( $|\beta| \geq 0.68$ ) and to  
230 account for multiple comparisons ( $P \leq 0.0001$ ). We also defined a new feature for each tested  
231 HLA class II allele, namely the anti-microbial response ratio (RR), which was calculated by  
232 dividing the number of significant and positive associations of the antibody repertoire breadth  
233 to multiple microbial species by the total number of microbial species for which we had  
234 identified at least one pairwise association (see the Materials and Methods). Our analysis  
235 revealed significant and positive associations of 10 HLA class II alleles with the antibody  
236 repertoire breadth against at least one of 11 microbial species and no negative associations  
237 were identified. Positive associations were most robust [i.e.,  $-\log_{10}(P\text{-value}) \geq 10$  and/or a RR  
238  $\geq 0.3$ ] for HLA class II alleles DRB1\*03:01:01G, DQB1\*03:01:01G, DRB1\*13:02:01 and

239 DQA1\*02:01, which were associated with the breadth of the antibody repertoires against  
240 multiple microbial species, such as *S. pneumoniae*, *S. aureus*, HRV-A, HRV-B, HHV-4, HHV-  
241 5, HHV-6B, HAdV-C and HRSV (Figure 1A). We also performed a regression analysis of the  
242 adjusted species-specific scores by using the HLA-DQA1~DQB1~DRB1 haplotypes with a  
243 frequency  $\geq 1\%$  (Supplementary Table S1) as explanatory variables. In this way, we identified  
244 significant positive associations between 14 haplotypes and the antibody repertoire breadth  
245 against 17 microbial species. With the exception of one haplotype, all positively associated  
246 haplotypes were represented by at least one of the HLA-DRB1, -DQB1 or -DQA1 alleles for  
247 which we had also independently identified an association with the antibody repertoire breadth.  
248 Of note, we observed a synergistic effect of multiple HLA class II alleles, as both the magnitude  
249 of RR and the strength of association with the antibody repertoires against individual species  
250 was higher in comparison to our previous analysis when each allele was assessed separately.  
251 Again, positive associations were most common with the antibody repertoire breadth against  
252 *S. pneumoniae*, *S. aureus*, HRV-A, HRV-B, HHV-4, HHV-5, HHV-6B, HAdV-C and HRSV.  
253 Moreover, we also identified positive associations with the antibody repertoire breadth against  
254 EV-A and -B, IAV, human parainfluenza virus (HPIV)-3, HHV-1, HHV-7 and *M. pneumoniae*,  
255 further demonstrating a synergistic effect of different HLA class II alleles (Figure 1B).

256

257 ***Associations between HLA-DRB1 genotypes and the antibody repertoire breadth against***  
258 ***common microbial infections***

259 Humans are diploid organisms and ultimately, it is likely that the synergistic effect of multiple  
260 HLA class II alleles encoded on both parental chromosomes defines the antibody binding  
261 repertoire of a given individual with a specific HLA class II genotype and diplotype. However,  
262 assessment of the role of all HLA-DQA1~DQB1~DRB1 diplotypes remains a challenge,  
263 primarily due to the extremely polymorphic nature of the classical HLA genes. Thus, studies

264 of very large cohorts are required to achieve sufficiently sized groups with identical diplotypes  
265 for statistical comparison; this was not feasible in our cohort of 800 individuals. To overcome  
266 this issue, we tested for associations between specific HLA-DRB1 genotype groups and the  
267 breadth of the antibody repertoires against each of the common microbial species described  
268 above, and took advantage of the strong LD of the HLA class II loci (Supplementary Figure  
269 S2). We first performed unsupervised clustering of the 800 individuals of our study cohort  
270 based on their HLA-DRB1 genotypes using a hierarchical density-based clustering algorithm  
271 (HDBSCAN). We focused on *HLA-DRB1*, which is the most polymorphic locus among the  
272 HLA class II genes, because it allowed us to assign a maximum number of individuals in our  
273 cohort to a specific cluster with significant probability estimation compared to any of the other  
274 less polymorphic HLA class II genes (not shown). Approximately 43% of the individuals (n =  
275 357) in our study cohort were clustered with significant probability estimation into one of 18  
276 clusters (denoted as HLA-DRB1 genotype groups 1–18) (Supplementary Figure S4A), with  
277 most groups representing a subset of closely HLA-matched individuals (Figure 2A) and each  
278 group represented by a sample size of  $\geq 12$  individuals (Supplementary Figure S4B). HLA-  
279 DRB1 genotype groups 14 and 18 exclusively comprised HLA-DRB1\*16:02:01 homozygotes  
280 (n = 12) and HLA-DRB1\*03:01:01G homozygotes (n = 17), respectively; which combined  
281 represented approximately 3.7% of our study cohort (Figure 2A and Supplementary Figure  
282 S4B). The remaining groups comprised HLA heterozygotes and most groups clustered into one  
283 of four supergroups that share a major allele (namely HLA-DRB1\*03:01:01G, HLA-  
284 DRB1\*07:01:01, DRB1\*15:01:01G or HLA-DRB1\*16:02:01) (Figure 2A). As described  
285 previously, individuals homozygous for the HLA-DRB1\*07:01:01 allele were completely  
286 absent from our study cohort (Table 1 and Supplementary Table S2). HLA-DRB1 groups 1  
287 and 3 included individuals with comparatively higher allelic diversity, representing  
288 approximately 3.2% of our study cohort (Figure 2A and Supplementary Figure S4B).

289

290 To test for associations between the antibody repertoire breadth against common microbial  
291 species and specific *HLA-DRB1* genotypes, we performed a linear regression analysis of the  
292 adjusted species score values, this time using the HLA-DRB1 genotype group assignment  
293 described above as explanatory variables. Of the 18 HLA-DRB1 genotype groups evaluated,  
294 we identified a significant positive association in 11 groups (groups 3–10, 12, 14 and 17) with  
295 the antibody repertoire breadth against at least one ( $RR \geq 0.0625$ ) and up to nine ( $RR = 0.5625$ )  
296 out of 16 microbial species. In contrast, heterozygosity for DRB1\*16:02:01 and the null allele  
297 DRB1\*15:96 (group 11) was negatively associated with the antibody repertoire breadth against  
298 HHV-1 (Figure 2A and C). Most robust positive associations ( $RR = 0.0625$ ) were found for  
299 individuals in HLA-DRB1 genotype group 8 carrying the DRB1\*07:01:01G allele in  
300 combination with either DRB1\*13:01:01G or DRB1\*13:02:01 (Figure 2A and 2C). Notably,  
301 no significant associations were found for HLA-DRB1\*03:01:01G homozygotes (group 18)  
302 and homozygosity for HLA-DRB1\*16:02:01 (group 14) was only marginally positively  
303 associated with the antibody repertoire breadth against HHV-3 [ $\beta = 0.81$ ;  $-\log_{10}(P\text{-value}) =$   
304  $4.12$ ]. In accordance with the results of our association studies at the allele and haplotype level,  
305 positive associations between HLA-DRB1 genotypes and the antibody repertoire breadth were  
306 mainly observed for a limited number of microbial species, including bacterial species such as  
307 *S. pneumoniae*, *S. aureus* and *M. pneumoniae*, human herpesviruses (HHV-1, HHV-3, HHV-  
308 4, HHV-5, HHV-6B), ‘common cold’ RNA viruses (HRV-A, HRV-B, HRSV, human  
309 metapneumovirus [HMPV]) and viruses that also (or primarily) infect the gastrointestinal tract  
310 of humans (HAdV-C, EV-A, EV-C), but usually cause only mild or no symptoms.

311

### 312 *Associations of HLA-DRB1 genotypes with specific antigens*

313 Finally, we sought to assess the effect of specific HLA-DRB1 alleles and genotypes at the  
314 antigen level. The gene products of advantageous HLA alleles and genotypes may not only be

315 able to present a broader array of pathogen-derived peptides than risk alleles and genotypes,  
316 but may also enhance the peptide-binding specificity and presentation of selected antigenic  
317 regions (*i.e.* epitopes) (23). To explore the effect of HLA-DRB1 genotypes on antibody binding  
318 specificities to common microbial antigens, we first filtered for peptide antigens that were  
319 significantly enriched in at least two samples of our cohort and were also differentially enriched  
320 across the different DRB1 groups described above, by using Fisher's exact test [ $-\log_{10}(P\text{-value})$   
321  $\geq 2.3$ ] and an OR of  $\geq 2$  or  $\leq -2$  as the cut-off. Interestingly, most of the variance among the  
322 retained differentially enriched peptide antigens was due to antibodies targeting proteins of a  
323 relatively few microbial species, most notably HHV-1, HHV-2, HHV-4, HHV-5, IAV, IBV,  
324 and HAdVs A-E (Figure 3A-B). We then filtered for protein antigens for which the  
325 differentially enriched peptides showed high variance (above the 75th quartile) across the  
326 different DRB1 groups (for details see the Materials and Methods section). Following the  
327 application of these stringent filter criteria, 28 protein antigens were retained, representing 13  
328 microbial species, most notably HHVs and HAdVs (Figure 3C). Among these microbial  
329 antigens, we found considerable variance in the antibody specificities targeting a variety of  
330 HHV proteins, including tegument proteins VP22, UL14, US11, VP 16, the envelope protein  
331 US9 and glycoprotein I (gI) of herpes simplex virus 1 (HSV-1, species HHV-1), the envelope  
332 glycoprotein D of herpes simplex virus 2 (HSV-2, species HHV-2), a VP26 homolog of  
333 varicella-zoster virus (VZV, species HHV-3) and the Epstein-Barr virus nuclear antigen 5  
334 (EBNA-5) as well as the SM protein (species HHV-4) (Figure 3B-G). A multiple sequence  
335 alignment of these HHV antigens by Clustal Omega did not reveal linear amino acid sequence  
336 similarities (not shown), indicating that these antigens are targeted by antibodies with distinct  
337 specificities owing to multiple HLA class II alleles. The VP26 homolog of VZV for example,  
338 was frequently targeted by individuals in DRB1 genotype group 14 (Figure 3C and 3F) that  
339 comprised homozygotes of HLA-DRB1\*16:02:01, a genotype we had also found to be  
340 associated with the antibody repertoire breadth to the same virus species (Figure 2C). In

341 contrast, we also found that individuals in some DRB1 groups (e.g. groups 4 and 5) had  
342 antibodies that frequently targeted antigenic peptides of different HAdV species. All these  
343 peptides showed a high degree of amino acid similarity and resembled a region of an  
344 orthologous core protein expressed by the different species (Figure 3B, 3C, 3H-J), suggesting  
345 similar antibody specificities that may also cross-react with antigens of the other HAdV  
346 species.



## 347 **Discussion**

348 In this study, we employed a systematic and unbiased approach to explore the relative  
349 contribution of germline genetic variation in classical HLA class II genes among the general  
350 adult population to human antibody responses, including antibody specificities to 48 common  
351 human-tropic pathogenic microbial species. By applying a high-throughput method for large-  
352 scale antibody profiling to a well-defined cohort of mostly Qatari nationals sharing genetic  
353 material as a result of high levels of inbreeding, we dissected the overall effect of zygosity for  
354 classical HLA class II genes, as well as effects associated with specific HLA class II alleles,  
355 haplotypes and genotypes, on the antimicrobial antibody repertoire breadth and antibody  
356 specificity with unprecedented resolution.

357

358 Our results provide direct evidence that heterozygosity in classical HLA class II genes confers  
359 a selective advantage in humans. Heterozygote advantage has been proposed as one of the main  
360 mechanisms that has driven HLA allelic diversity and resistance to infection during human  
361 evolution. However, direct empirical evidence from human studies has been sparse (1, 5). Our  
362 genetic analysis of classical HLA class II allele and genotype frequencies provided the first  
363 evidence in support of this mechanism in the context of HLA class II loci. Surprisingly,  
364 although HLA-DRB1\*07:01:01 was one of the most common DRB1 alleles in our study cohort  
365 [AF = 15.06%, n (heterozygotes) = 241], HLA-DRB1\*07:01:01 homozygotes were completely  
366 absent, suggesting that this genotype is under negative selective pressure ( $P < 0.00001$ ). In  
367 contrast, individuals heterozygous for HLA-DRB1\*07:01:01 exhibited an antimicrobial  
368 antibody profile that was largely indistinguishable from that of individuals who expressed other  
369 more or less common DRB1 alleles investigated in this study. When assessed separately, we  
370 found HLA-DRB1\*07:01:01 was associated only with antibody responses against *S. aureus*  
371 (Figure 1A). In contrast, individuals with a haplotype carrying the HLA-DRB1\*07:01:01 allele

372 in combination with other HLA-DQA and -DQB alleles (e.g. haplotypes  
373 DRB1\*07:01:01G~DQA1\*03:01:01G~DQB1\*03:02:01G or  
374 DRB1\*07:01:01G~DQA1\*01:02:01G~DQB1\*02:01:01G) exhibited broad antibody  
375 responses that were associated with polyclonal antibody responses to a variety of microbial  
376 species (Figure 1B). Similarly, we found a positive association between individuals in DRB1  
377 group 8, with most of them heterozygous for the HLA-DRB1\*07:01:01 and DRB1\*13:01:01G  
378 alleles (Figure 2A), and the antibody repertoire breadth to a variety of microbial species (RR  
379 >0.5; Figure 2C). The same individuals also showed strong antibody responses to specific  
380 antigens, such as the IBV N protein, the HHV-1 envelope and tegument proteins, the HRSV  
381 phosphoprotein, and EBNA-5 (Figure 3C). Taken together, these findings suggest a highly  
382 redundant role of the DRB1\*07:01 allele in the antibody responses in heterozygous individuals  
383 and a compensatory effect of other HLA class II alleles, although this remains to be verified.  
384 Of note, the HLA-DRB1\*07:01 allele has previously been associated with persistent HCV  
385 infection (24), as well as asparaginase hypersensitivity and anti-asparaginase antibodies and  
386 may therefore lead to suboptimal drug responses and a greater risk of relapse in heterozygous  
387 carriers who develop leukemia and lymphomas (25). It remains to be determined whether  
388 homozygotes for this allele are more prone to certain infectious, allergic or autoimmune  
389 diseases, or if this genotype is perhaps associated with other diseases, early death or infertility.  
390 The DRB1\*07:01 AF in our study cohort is largely comparable or even lower than that reported  
391 for other Arab populations and ethnicities, such as Saudis (26.6%), Yemenite-Jews (22.1%),  
392 Libyans (17.0%) or Algerians (15.9%) (26), suggesting that homozygosity of this allele may  
393 represent a common and important genetic risk factor among Arab populations, particularly for  
394 children of consanguineous parents.

395

396 We also demonstrate that overall (*i.e.*, irrespective of the DRB1 allele), HLA-DRB1  
397 heterozygotes have a broader antibody repertoire against a variety of viral and opportunistic

398 bacterial pathogens, including HHV-4, HHV-5, HHV-6B, HRV-A, HRV-B and HAdV-C, *S.*  
399 *aureus* and *S. pneumoniae*, when compared to HLA-DRB1 homozygotes, which we found to  
400 represent a smaller but still sizable proportion (5.75%, n = 46) of our study cohort (Table 1).  
401 The relatively high proportion of HLA homozygotes in our study cohort can be explained by  
402 the high rates of consanguineous marriage in the State of Qatar (20). Finally, we provide  
403 evidence of a heterozygote advantage of classical HLA class II loci by a comparative analysis  
404 of groups of closely HLA-matched individuals assigned to distinct groups based on their HLA-  
405 DRB1 genotypes. Two of these groups comprised HLA-DRB1\*16:02:01 homozygotes (group  
406 14, n = 12) or HLA-DRB1\*03:01:01G homozygotes (group 18, n = 17) exclusively. Neither  
407 of the two groups of HLA-DRB1 homozygotes exhibited antibody responses that were  
408 associated with the antibody repertoire breadth or strong antibody responses to specific  
409 antigens of multiple microbial species. In contrast, heterozygotes in group 17 expressing the  
410 common DRB1\*03:01:01G and DRB1\*07:01:01G alleles for example, exhibited antibody  
411 responses that were positively associated with the antibody repertoire breadth against *S.*  
412 *pneumoniae*, *S. aureus* and HHV-1 (Figure 2), and had stronger antibody responses to specific  
413 antigens, such as HHV-1 tegument proteins and a cell wall surface protein of *S. pneumoniae*  
414 (Figure 3C). The only significant association we could identify between a homozygous HLA-  
415 DRB1\*16:02:01 genotype and HHV-3 (Figure 2) was attributable mainly to specific responses  
416 against a single viral antigen, namely a small capsomere-interacting protein of VZV and  
417 homolog of HSV-1 VP26 (Figure 3C and 3F). To the best of our knowledge, this is the first  
418 study to provide empirical evidence of a heterozygote advantage of classical HLA class II  
419 genes in humans. Thus far, heterozygote advantage in HLA loci has only been documented in  
420 the context of HIV infection, as this virus produces escape variants during chronic infection at  
421 a considerable frequency (1). Maximum HLA heterozygosity of the classical HLA class I genes  
422 *HLA-A*, *-B* and *-C* has been associated with delayed disease onset among HIV-1 infected  
423 patients, whereas individuals who were homozygous for one or more loci progressed rapidly

424 to AIDS and death (27). Other well-known examples of heterozygote advantage include the  
425 recessive disease-causing variants underlying sickle-cell anemia, with one copy of the HbS  
426 allele shown to protect heterozygotes from severe forms of malaria (28). Interestingly, an *in*  
427 *silico* analysis by Sellis *et al.* (29) suggested that a substantial proportion of host adaptive  
428 mutations that occur(ed) during human and vertebrate evolution could confer a heterozygote  
429 advantage, as rapidly changing environments and genetic variation produce a diversity  
430 advantage in diploid organisms that allows them to remain better adapted compared with  
431 haploids, despite the fitness disadvantage associated with the occurrence of rare homozygotes  
432 (29).

433

434 Our findings also demonstrate that multiple alleles of the classical HLA class II genes (i.e.  
435 HLA-DRB1, -DQA1 and -DQB1) play a synergistic role in shaping the antibody repertoire  
436 against microbial pathogens. Indeed, when analyzing each allele in isolation, we found only a  
437 limited number of associations between a given allele and the antibody repertoire breadth to a  
438 specific microbial species. However, when considering HLA-DQA1~DQB1~DRB1  
439 haplotype-specific responses, we identified additional associations between certain allele  
440 combinations and the antimicrobial antibody responses, with most groups of individuals  
441 sharing the same haplotype also mounting robust antibody responses to a larger number of  
442 microbial species. Our results therefore support the concept that viral infections, along with  
443 other infectious diseases, have helped to maintain strong immunity and resistance to common  
444 infections during human evolution by promoting diversity in HLA class II alleles and  
445 consequently, in B cell-mediated antibody responses (30). The reasons why HLA diversity at  
446 the individual (host) level remains relatively low have been debated since expression of even  
447 more HLA molecules or molecular variants by a given individual, which may arise through  
448 gene duplication events that have occurred throughout vertebrate evolution, would  
449 theoretically allow the binding and presentation of even a broader spectrum of antigens, thereby

450 enhancing immunity to infections (of note, this may be the case for some individuals with  
451 haplotypes that express additional functional DRB genes, which were not present in our study  
452 cohort) (5). The associated trade-off effects appear to be the most plausible explanation.  
453 Indeed, certain HLA alleles have been shown to play a protective role in the context of certain  
454 infectious diseases, while at the same time being associated with an increased risk for  
455 autoimmune diseases (5, 10, 31). In this regard, it should be noted that the HLA-DRB1\*03:01  
456 allele, which was relatively common in our study cohort (AF 15.81%), has been reported to be  
457 risk allele for autoimmune hepatitis (AIH) (32). AIH may develop not only after hepatitis A,  
458 B or C infections, but also following more common infections with HSV-1, EBV, or measles  
459 virus. The prevalence of AIH in the general adult population in this study remains unknown.  
460  
461 Interestingly, using our unbiased, large-scale screen and in-depth analysis of antibody  
462 specificities to 48 microbial species, we predominantly and repeatedly identified positive  
463 associations with antibody responses against members of the *Herpesviridae* family [such as  
464 HSV-1 (HHV-1), VZV (HHV-3), EBV (HHV-4), CMV (HHV-5), and roseolavirus (HHV-  
465 6B)], *Picornaviridae* (including HRV-A and -B, EV-A, -B and -C), *Paramyxoviridae* (e.g.  
466 HRSV, and HMPV), *Adenoviridae* (HAdV-C) and also against opportunistic bacterial  
467 pathogens that frequently colonize the upper airways of humans but are typically innocuous  
468 (e.g. *S. aureus*, *S. pneumoniae* and *M. pneumoniae*). This raises the question of whether these  
469 microbial species have also played a critical role during hominine evolution by driving genetic  
470 diversity in the classical HLA class II loci. Recent advances in microbial genetics enabling  
471 molecular clock analyses suggest that, although phylogenetically diverse, many if not all of  
472 these species have evolved in very close association with their human host, some of them (e.g.  
473 HSV-1) for millennia; similar findings were obtained for their counterparts infecting primates  
474 or other vertebrates (30). Indeed, although cross-species transmissions in the more recent past  
475 have occurred, it is becoming increasingly evident that most human pathogens have their

476 origins long before the Neolithic era (33). A commonly stated hypothesis is that pandemic  
477 outbreaks of major human infectious diseases (*e.g.* influenza, hepatitis, tuberculosis, malaria,  
478 leishmaniasis, and schistosomiasis) that occurred in the more recent (*i.e.* the post-Neolithic)  
479 past, causing considerable morbidity and mortality, have been major driving forces of HLA  
480 genetic diversity. While this may be true based on the identification of several positive and  
481 negative HLA/MHC associations with these diseases (10), the role of other human infectious  
482 agents, particularly those that have co-evolved with their human host for much longer periods,  
483 should not be neglected simply on the basis that they cause no, or only mild, clinical disease in  
484 most cases of (modern) human infection. Even herpesviruses such as HSV-1, EBV or CMV,  
485 which are most commonly acquired early in life or during childhood, can cause fatal disease in  
486 rare patients, either following primary infection of genetically susceptible individuals (34), or  
487 reactivated infections in patients with cancer, autoimmune diseases or other comorbidities (35).  
488 Moreover, infections can have more subtle effects on human reproductive fitness. The effects  
489 of these ‘modern human pathogens’ on our hominine ancestors and phylogenetically closest  
490 relatives (*i.e.*, archaic humans, such as Neanderthals and Denisovans) that are extinct today are  
491 also unknown.

492

493 It is also important to highlight the limitations of our study. With our large-scale antibody  
494 screening approach, we were primarily able to assess antibody specificities and repertoires to  
495 linear epitopes of protein antigens, predominantly of human-tropic viruses. Although there is  
496 evidence these include neutralizing and non-neutralizing antibodies (21), further investigations  
497 are required to elucidate the extent to which these genetic and associated immune phenotypic  
498 differences affect clinical outcomes of infection, either by long-term longitudinal studies of  
499 even larger human cohorts, or a case-control study of selected diseases.

## 500 **Materials and Methods**

### 501 *Study cohort*

502 The study cohort of 800 adult male and female Qatari nationals and long-term residents of  
503 Qatar were randomly selected from a larger cohort of individuals taking part in a longitudinal  
504 study of the Qatar Biobank (QBB) (18) as described previously (22). Relevant demographic  
505 data of the study subjects have been described previously (22).

506

### 507 *HLA type interference from whole genome sequencing data*

508 Whole genome sequencing (WGS) of our study cohort was performed as part of the Qatar  
509 Genome Programme (QGP) (<https://qatargenome.org.qa/>). Sequencing read data were  
510 generated and processed as described elsewhere (36). In brief, sequencing libraries were  
511 generated from whole blood-derived fragmented DNA using the TruSeq DNA Nano kit  
512 (Illumina, Inc., San Diego, USA) and sequence reads were generated using a HiSeq X Ten1  
513 system (Illumina, Inc., San Diego, USA). Primary sequencing data were demultiplexed using  
514 bcl2fastq (Illumina) and quality control of the raw data was performed using FastQC [v0.11.2]  
515 (Babraham Bioinformatics, Babraham Institute, Cambridge, UK). Sequence reads were aligned  
516 to the human reference genome sequence [build GRCh38] using Sentieon Genomics pipeline  
517 tools (Sentieon, Inc, San Jose, USA) and HLA type interference was performed using the PRG  
518 framework described by Dilthey *et al.* (19).

519

### 520 *Genetic fixation index and linkage analysis, population differentiation and homozygosity* 521 *estimation*

522 The genetic fixation index was calculated using PLINK [v 1.9] (37). Linkage disequilibrium  
523 (LD) was quantified using eLD (38). The expected number of homozygotes for a given HLA  
524 class II allele was estimated based on the imputed allele frequencies using PRG and assuming

525 Hardy–Weinberg equilibrium. Deviation from the Hardy–Weinberg equilibrium was assessed  
526 using Fisher’s exact test and the Bonferroni method was used to correct for multiple testing. A  
527  $-\log_{10}(P\text{-value}) \geq 4.7$  was considered to indicate statistical significance.

528

### 529 ***Hierarchical density-based clustering by HLA-DRB1 genotypes***

530 A hierarchical density-based clustering algorithm (HDBSCAN) (39) was used to assign  
531 individuals in our cohort to specific clusters (denoted as HLA-DRB1 genotype groups) with  
532 significant probability estimation. In brief, we treated each allele as a feature dimension and  
533 generated a hyper-dimensional feature space for each variant found in *HLA-DRB1*. The t-  
534 distribution stochastic neighbor embedding (tSNE) method was used for two-dimensional (2D)  
535 non-linear projection of the multi-dimensional allele feature space. By combining non-linear  
536 dimensionality reduction and density-based unsupervised hierarchical clustering, we identified  
537 18 groups of individuals with similar/matching HLA-DRB1 genotypes that could be clearly  
538 distinguished from other clusters; each group had a minimum sample size of 12  
539 (Supplementary Figure S4B). A probability score of  $\geq 0.9$  was used as cut-off for the cluster  
540 assignment; individuals that could not be assigned to any cluster with significant probability  
541 estimation ( $n = 443$ ) were removed from the downstream analysis.

542

### 543 ***Phage immunoprecipitation-sequencing (PhIP-Seq) and peptide enrichment analysis***

544 The VirScan phage library used for PhIP-Seq in the present study had been obtained from S.  
545 Elledge (Brigham and Women’s Hospital and Harvard University Medical School, Boston,  
546 MA, USA). PhIP-Seq of serum samples from the 800 study subjects and peptide enrichment  
547 analysis were performed as described previously (16, 17, 22). In brief, we utilized an expanded  
548 version (21) of the original VirScan phage library described by Xu *et. al.* (17). Custom  
549 sequencing libraries were prepared as previously described (16) and sequencing was performed



550 using a NextSeq system (Illumina). To filter for significantly enriched peptides, we imputed -  
551  $\log_{10}(P\text{-values})$  by fitting a zero-inflated generalized Poisson model to the distribution of output  
552 counts and regressed the parameters for each peptide sequence based on the input read count.  
553 Peptides that passed a reproducibility threshold of 2.3 [ $-\log_{10}(P\text{-value})$ ] in two technical sample  
554 replicates were considered significantly enriched. We then computed virus score values as  
555 described by Xu *et al.* (17) and the scores were finally adjusted by dividing them according to  
556 previously established species-specific significance cut-off values (22). Samples with an  
557 adjusted species score  $\geq 1$  were considered seropositive for the corresponding microbial  
558 species. The prevalence for each species was calculated as the number of seropositive samples  
559 divided by total number of samples in the cohort. Similarly, we estimated seroprevalence  
560 values for each sex separately (Table 2). We excluded antibody specificities to species from  
561 our downstream analysis for which we have found the seroprevalence in the local adult  
562 population to be below 5%.

563

#### 564 *Association studies*

565 We examined the contribution of the genetic variation in the classical HLA class II loci to the  
566 diversity of the antibody repertoire at different resolutions (*i.e.*, by independently assessing the  
567 effect of zygosity, haplotypes, alleles and HLA-DRB1 genotype groups). The adjusted species  
568 score values were used as response variables (these values served as a measure of the antibody  
569 repertoire breadth against each of the 48 microbial species evaluated in this study), and  
570 generalized linear models (GLM) were applied (for details see the supplementary materials).  
571 We corrected for multiple testing using the Bonferroni method. Coefficients of association ( $\beta$ )  
572 were reported using a natural log scale; a  $|\beta| \geq 0.68$  and a  $P\text{-value} \leq 0.0001$  was considered to  
573 indicate statistical significance. We defined the anti-microbial RR as a new feature for the  
574 assessment of HLA class II alleles, haplotypes, or HLA-DRB1 genotype groups. The RR for a

575 given HLA class II allele was calculated by dividing the number of significant associations of  
576 the allele examined by the total number of microbial species for which we identified at least  
577 one significant association to any HLA class II alleles assessed in this study. The RR for  
578 haplotypes or HLA-DRB1 genotype groups were calculated similarly.

579

580 ***Differential enrichment analysis of antibody-antigen interactions across DRB1 genotype***  
581 ***groups***

582 To examine the differential enrichment at the peptide and antigen level, we first performed  
583 pairwise differential enrichment tests per peptide, accounting for all possible pairwise  
584 comparisons of the DRB1 genotype groups identified ( $n = 18$ ). We considered only peptides  
585 that were significantly enriched in at least two samples among the total number of samples  
586 tested. Accordingly, for each peptide assessed, we performed 153 pair-wise differential  
587 enrichment tests ( $((n \times (n-1))/2)$ ). Using these filter criteria, we tested, on average, 3,989 ( $\pm 150$ )  
588 peptides per DRB1 group-pair and a total of 9,155 enriched peptides when considering all  
589 DRB1 genotype groups combined. Next, we tested for differential enrichment of antibody-  
590 antigen interactions in each tested DRB1 group-pair using an  $|OR| \geq 2$  and a  $P$ -value  $\leq 0.005$   
591 (Fisher's exact test) as the cut-off. After removing peptides from microbial species with a  
592 seroprevalence of less than 5%, 502 differentially enriched peptides (DEP) were used in our  
593 downstream analysis. We then assessed the variance of significant antibody-antigen  
594 interactions (*i.e.*, per UniProtKB entry) across DRB1 genotype groups. To do so, we first  
595 estimated the peptide enrichment frequency of each DEP ( $n = 502$ ) per DRB1 genotype group.  
596 This peptide enrichment frequency was calculated as the ratio of the number of samples in the  
597 DRB1 genotype group for which a DEP was significantly enriched, divided by the total number  
598 of samples in that group. Next, we calculated the mean of the peptide enrichment frequency  
599 per UniProtKB entry for each DRB1 group. Finally, we assessed the variance in this mean

600 value for each Uniprot entry and DRB1 group to identify the antibody-antigen interactions with  
601 the highest variance across different DRB1 groups. For this purpose, we only considered  
602 UniProtKB entries for which the variance distribution was above the 75th quartile and at least  
603 two DEP were identified. Finally, we filtered for UniProtKB entries for which DEPs were less  
604 frequent (<5 %) among individuals in least one of the DRB1 groups.

605

### 606 ***Study approval***

607 The human subject research described here was approved by the institutional research ethics  
608 boards of Sidra Medicine and the Qatar Biobank. This included the receipt of written informed  
609 consent from all study participants at the recruitment site (Qatar Biobank).

610

### 611 ***Data and code availability***

612 All processed data are available in the manuscript or the supplementary materials. Raw reads  
613 from PhIP-Seq are made available in NCBI's Sequence Read Archive (Accession:  
614 PRJNA685111) upon publication of the paper. Python in-house scripts used in this study are  
615 available upon request. The pipeline for processing the PhIP-Seq data has been published  
616 previously (16). Raw WGS data of the study participants are accessible through the Qatar  
617 Genome Programme (<https://qatargenome.org.qa>; e-mail: [genome@qf.org.qa](mailto:genome@qf.org.qa)).

## 618 **References**

- 619 1. J. Trowsdale, J. C. Knight, Major histocompatibility complex genomics and human  
620 disease. *Annu Rev Genomics Hum Genet* **14**, 301-323 (2013).
- 621 2. J. E. Park *et al.*, A cell atlas of human thymic development defines T cell repertoire  
622 formation. *Science* **367**, (2020).
- 623 3. G. L. Stritesky, S. C. Jameson, K. A. Hogquist, Selection of self-reactive T cells in the  
624 thymus. *Annu Rev Immunol* **30**, 95-114 (2012).
- 625 4. L. Quintana-Murci, Human Immunology through the Lens of Evolutionary Genetics.  
626 *Cell* **177**, 184-199 (2019).
- 627 5. J. Radwan, W. Babik, J. Kaufman, T. L. Lenz, J. Winternitz, Advances in the  
628 Evolutionary Understanding of MHC Polymorphism. *Trends Genet* **36**, 298-311  
629 (2020).
- 630 6. J. Robinson *et al.*, IPD-IMGT/HLA Database. *Nucleic Acids Res* **48**, D948-D955  
631 (2020).
- 632 7. J. L. Casanova, L. Abel, Human genetics of infectious diseases: Unique insights into  
633 immunological redundancy. *Semin Immunol* **36**, 1-12 (2018).
- 634 8. P. J. McLaren *et al.*, Polymorphisms of large effect explain the majority of the host  
635 genetic contribution to variation of HIV-1 virus load. *Proc Natl Acad Sci U S A* **112**,  
636 14658-14663 (2015).
- 637 9. S. Limou *et al.*, Genomewide Association Study of an AIDS-Nonprogression Cohort  
638 Emphasizes the Role Played by HLA Genes (ANRS Genomewide Association Study  
639 02). *The Journal of Infectious Diseases* **199**, 419-426 (2009).
- 640 10. V. Matzaraki, V. Kumar, C. Wijmenga, A. Zhernakova, The MHC locus and genetic  
641 susceptibility to autoimmune and infectious diseases. *Genome Biol* **18**, 76 (2017).

- 642 11. R. N. Germain, Maintaining system homeostasis: the third law of Newtonian  
643 immunology. *Nature Immunology* **13**, 902-906 (2012).
- 644 12. M. M. Davis, C. M. Tato, D. Furman, Systems immunology: just getting started. *Nat*  
645 *Immunol* **18**, 725-732 (2017).
- 646 13. S. Jonsson *et al.*, Identification of sequence variants influencing immunoglobulin  
647 levels. *Nat Genet* **49**, 1182-1191 (2017).
- 648 14. C. Hammer *et al.*, Amino Acid Variation in HLA Class II Proteins Is a Major  
649 Determinant of Humoral Response to Common Viruses. *Am J Hum Genet* **97**, 738-743  
650 (2015).
- 651 15. P. Scepanovic *et al.*, Human genetic variants and age are the strongest predictors of  
652 humoral immune responses to common pathogens and vaccines. *Genome Med* **10**, 59  
653 (2018).
- 654 16. D. Mohan *et al.*, Publisher Correction: PhIP-Seq characterization of serum antibodies  
655 using oligonucleotide-encoded peptidomes. *Nat Protoc* **14**, 2596 (2019).
- 656 17. G. J. Xu *et al.*, Viral immunology. Comprehensive serological profiling of human  
657 populations using a synthetic human virome. *Science* **348**, aaa0698 (2015).
- 658 18. H. Al Kuwari *et al.*, The Qatar Biobank: background and methods. *BMC Public Health*  
659 **15**, 1208 (2015).
- 660 19. A. T. Dilthey *et al.*, High-Accuracy HLA Type Inference from Whole-Genome  
661 Sequencing Data Using Population Reference Graphs. *PLoS Comput Biol* **12**, e1005151  
662 (2016).
- 663 20. A. Bener, R. Hussain, A. S. Teebi, Consanguineous marriages and their effects on  
664 common adult diseases: studies from an endogamous population. *Med Princ Pract* **16**,  
665 262-267 (2007).
- 666 21. M. J. Mina *et al.*, Measles virus infection diminishes preexisting antibodies that offer  
667 protection from other pathogens. *Science* **366**, 599-606 (2019).

- 668 22. T. Khan *et al.*, Distinct antibody repertoires against endemic human coronaviruses in  
669 children and adults. *bioRxiv*, 2020.2006.2021.163394 (2020).
- 670 23. J. Arora *et al.*, HLA Heterozygote Advantage against HIV-1 Is Driven by Quantitative  
671 and Qualitative Differences in HLA Allele-Specific Peptide Presentation. *Molecular*  
672 *Biology and Evolution* **37**, 639-650 (2019).
- 673 24. M. Thursz, R. Yallop, R. Goldin, C. Trepo, H. C. Thomas, Influence of MHC class II  
674 genotype on outcome of infection with hepatitis C virus. The HENCORE group.  
675 Hepatitis C European Network for Cooperative Research. *Lancet* **354**, 2119-2124  
676 (1999).
- 677 25. C. A. Fernandez *et al.*, HLA-DRB1\*07:01 is associated with a higher risk of  
678 asparaginase allergies. *Blood* **124**, 1266-1276 (2014).
- 679 26. A. Hajje, W. Y. Almawi, A. Arnaiz-Villena, L. Hattab, S. Hmida, in *PLoS One*. (2018),  
680 vol. 13.
- 681 27. M. Carrington *et al.*, HLA and HIV-1: heterozygote advantage and B\*35-Cw\*04  
682 disadvantage. *Science* **283**, 1748-1752 (1999).
- 683 28. A. C. Allison, Genetic control of resistance to human malaria. *Curr Opin Immunol* **21**,  
684 499-505 (2009).
- 685 29. D. Sellis, B. J. Callahan, D. A. Petrov, P. W. Messer, Heterozygote advantage as a  
686 natural consequence of adaptation in diploids. *Proc Natl Acad Sci U S A* **108**, 20666-  
687 20671 (2011).
- 688 30. L. M. Van Blerkom, Role of viruses in human evolution. *Am J Phys Anthropol Suppl*  
689 **37**, 14-46 (2003).
- 690 31. V. Apanius, D. Penn, P. R. Slev, L. R. Ruff, W. K. Potts, The Nature of Selection on  
691 the Major Histocompatibility Complex. *Crit Rev Immunol* **37**, 75-120 (2017).

- 692 32. N. M. van Gerven *et al.*, HLA-DRB1\*03:01 and HLA-DRB1\*04:01 modify the  
693 presentation and outcome in autoimmune hepatitis type-1. *Genes and immunity* **16**,  
694 247-252 (2015).
- 695 33. C. J. Houldcroft, S. J. Underdown, Neanderthal genomics suggests a pleistocene time  
696 frame for the first epidemiologic transition. *Am J Phys Anthropol* **160**, 379-388 (2016).
- 697 34. E. Jouanguy *et al.*, Human inborn errors of immunity to herpes viruses. *Curr Opin*  
698 *Immunol* **62**, 106-122 (2020).
- 699 35. J. R. Kerr, Epstein-Barr virus (EBV) reactivation and therapeutic inhibitors. *J Clin*  
700 *Pathol* **72**, 651-658 (2019).
- 701 36. M. K. Smatti, Y. A. Al-Sarraj, O. Albagha, H. M. Yassine, Host Genetic Variants  
702 Potentially Associated With SARS-CoV-2: A Multi-Population Analysis. *Front Genet*  
703 **11**, 578523 (2020).
- 704 37. S. Purcell *et al.*, PLINK: a tool set for whole-genome association and population-based  
705 linkage analyses. *Am J Hum Genet* **81**, 559-575 (2007).
- 706 38. Y. Okada, eLD: entropy-based linkage disequilibrium index between multiallelic sites.  
707 *Human Genome Variation* **5**, 29 (2018).
- 708 39. L. McInnes, J. Healy, S. Astels, Hierarchical density based clustering. *Journal of Open*  
709 *Source Software* **2**, 205 (2017).
- 710

711 ***Author contribution statement***

712 NM conceived the study and supervised the project. MR and FA designed and performed  
713 experiments. TK developed the data analysis tools for the association studies and differential  
714 enrichment analysis. TK, NM and IA analyzed and interpreted the data. PJ co-supervised the  
715 HLA variant analysis. NM and TK wrote the paper. All authors have seen and approved the  
716 manuscript, which has not been accepted or published elsewhere.

717

718 ***Acknowledgments***

719 We thank the QBB study participants who provided samples and data for this study. We also  
720 thank Qatar Genome and the QBB management and staff, in particular Nahla Afifi, Said I.  
721 Ismail and Elizabeth Jose, for allowing us to access and analyze QBB/QGP samples and data;  
722 the Integrated Genomics Services team of Sidra Genomics for generating and processing WGS  
723 data of study participants; Stephen Elledge (Brigham and Women's Hospital, Harvard  
724 University Medical School) for kindly providing the VirScan phage library used in this study  
725 and for his early discussions related to this work; Tomasz Kula (Brigham and Women's  
726 Hospital, Harvard University Medical School) and Benjamin Larman (Johns Hopkins School  
727 of Medicine) for their advice on technical aspects related to the PhIP-Seq experiments, as well  
728 as Jessica Tamanini (Insight Editing London) for proofreading and editing the manuscript. This  
729 work was supported by a grant from the Qatar National Research Fund (grant no. PPM1-1220-  
730 150017).



731 **Tables**

732 **Table 1. HLA class II alleles in the Qatar Biobank cohort (n = 800) with an estimated**  
 733 **allele frequency  $\geq 0.5\%$**

| Allele                       | Gene | n (heterozygotes) | n (homozygotes) | n (total) <sup>A</sup> | AF <sup>B</sup> |
|------------------------------|------|-------------------|-----------------|------------------------|-----------------|
| DPA1*01:03:01G               | DPA1 | 304               | 405             | 709                    | 69.63%          |
| DPA1*02:01:01; DPA1*02:01:08 | DPA1 | 194               | 47              | 241                    | 18.00%          |
| DPA1*02:02:02                | DPA1 | 80                | 3               | 83                     | 5.38%           |
| DPA1*02:01:02                | DPA1 | 25                | 0               | 25                     | 1.56%           |
| DPA1*03:03                   | DPA1 | 18                | 0               | 18                     | 1.13%           |
| DPA1*02:01:03                | DPA1 | 18                | 0               | 18                     | 1.13%           |
| DPA1*02:02:05                | DPA1 | 13                | 0               | 13                     | 0.81%           |
| DPA1*02:01:06                | DPA1 | 10                | 0               | 10                     | 0.63%           |
| DPB1*04:01:01G               | DPB1 | 351               | 130             | 481                    | 38.19%          |
| DPB1*02:01:02G               | DPB1 | 230               | 30              | 260                    | 18.13%          |
| DPB1*03:01:01G               | DPB1 | 151               | 15              | 166                    | 11.31%          |
| DPB1*14:01:01                | DPB1 | 114               | 4               | 118                    | 7.63%           |
| DPB1*13:01:01G               | DPB1 | 68                | 9               | 77                     | 5.38%           |
| DPB1*04:02:01G               | DPB1 | 71                | 3               | 74                     | 4.81%           |
| DPB1*01:01:01G               | DPB1 | 53                | 2               | 55                     | 3.56%           |
| DPB1*17:01:01G               | DPB1 | 42                | 0               | 42                     | 2.63%           |
| DPB1*10:01                   | DPB1 | 27                | 5               | 32                     | 2.31%           |
| DPB1*09:01:01                | DPB1 | 27                | 1               | 28                     | 1.81%           |
| DPB1*05:01:01G               | DPB1 | 15                | 0               | 15                     | 0.94%           |
| DPB1*15:01:01G               | DPB1 | 12                | 0               | 12                     | 0.75%           |
| DQA1*05:01:01G               | DQA1 | 308               | 60              | 368                    | 26.75%          |
| DQA1*01:02:01G               | DQA1 | 275               | 68              | 343                    | 25.69%          |
| DQA1*02:01                   | DQA1 | 214               | 34              | 248                    | 17.63%          |
| DQA1*03:01:01G               | DQA1 | 179               | 29              | 208                    | 14.81%          |
| DQA1*01:01:01G               | DQA1 | 100               | 8               | 108                    | 7.25%           |
| DQA1*01:03:01G               | DQA1 | 83                | 3               | 86                     | 5.56%           |
| DQA1*04:01:01G               | DQA1 | 27                | 0               | 27                     | 1.69%           |
| DQA1*06:01:01G               | DQA1 | 9                 | 0               | 9                      | 0.56%           |
| DQB1*02:01:01G               | DQB1 | 355               | 92              | 447                    | 33.69%          |
| DQB1*05:02:01G               | DQB1 | 172               | 37              | 209                    | 15.38%          |
| DQB1*03:01:01G               | DQB1 | 166               | 10              | 176                    | 11.63%          |
| DQB1*03:02:01G               | DQB1 | 153               | 22              | 175                    | 12.31%          |
| DQB1*05:01:01G               | DQB1 | 88                | 6               | 94                     | 6.25%           |
| DQB1*06:02:01G               | DQB1 | 70                | 4               | 74                     | 4.88%           |
| DQB1*06:03:01G               | DQB1 | 58                | 3               | 61                     | 4.00%           |
| DQB1*06:04:01G               | DQB1 | 40                | 3               | 43                     | 2.88%           |
| DQB1*04:02:01G               | DQB1 | 40                | 0               | 40                     | 2.50%           |
| DQB1*06:01:01G               | DQB1 | 39                | 0               | 39                     | 2.44%           |

|                |      |     |     |     |        |
|----------------|------|-----|-----|-----|--------|
| DQB1*05:03:01G | DQB1 | 22  | 0   | 22  | 1.38%  |
| DQB1*03:03:02G | DQB1 | 18  | 0   | 18  | 1.13%  |
| DQB1*06:09:01G | DQB1 | 15  | 0   | 15  | 0.94%  |
| DRB1*07:01:01G | DRB1 | 241 | 0   | 241 | 15.06% |
| DRB1*03:01:01G | DRB1 | 219 | 17  | 236 | 15.81% |
| DRB1*16:02:01  | DRB1 | 144 | 12  | 156 | 10.50% |
| DRB1*15:01:01G | DRB1 | 82  | 4   | 86  | 5.63%  |
| DRB1*04:03:01  | DRB1 | 86  | 0   | 86  | 5.38%  |
| DRB1*04:02:01  | DRB1 | 67  | 0   | 67  | 4.19%  |
| DRB1*13:02:01  | DRB1 | 56  | 4   | 60  | 4.00%  |
| DRB1*13:01:01G | DRB1 | 52  | 2   | 54  | 3.50%  |
| DRB1*15:13     | DRB1 | 51  | 0   | 51  | 3.19%  |
| DRB1*11:01:01G | DRB1 | 45  | 1   | 46  | 2.94%  |
| DRB1*11:04:01G | DRB1 | 44  | 1   | 45  | 2.88%  |
| DRB1*16:01:01  | DRB1 | 43  | 0   | 43  | 2.69%  |
| DRB1*10:01:01  | DRB1 | 41  | 0   | 41  | 2.56%  |
| DRB1*01:01:01G | DRB1 | 30  | 2   | 32  | 2.13%  |
| DRB1*15:02:01  | DRB1 | 28  | 0   | 28  | 1.75%  |
| DRB1*04:05:01  | DRB1 | 27  | 0   | 27  | 1.69%  |
| DRB1*03:02:01  | DRB1 | 23  | 1   | 24  | 1.56%  |
| DRB1*01:02:01G | DRB1 | 23  | 0   | 23  | 1.44%  |
| DRB1*13:03:01G | DRB1 | 18  | 1   | 19  | 1.25%  |
| DRB1*15:03:01G | DRB1 | 19  | 0   | 19  | 1.19%  |
| DRB1*08:04:01  | DRB1 | 19  | 0   | 19  | 1.19%  |
| DRB1*14:01:01G | DRB1 | 14  | 0   | 14  | 0.88%  |
| DRB1*15:96     | DRB1 | 14  | 0   | 14  | 0.88%  |
| DRB1*11:01:02  | DRB1 | 14  | 0   | 14  | 0.88%  |
| DRB1*07:10N    | DRB1 | 13  | 0   | 13  | 0.81%  |
| DRB1*04:01:01  | DRB1 | 12  | 0   | 12  | 0.75%  |
| DRB1*12:01:01G | DRB1 | 11  | 0   | 11  | 0.69%  |
| DRB1*04:06:01G | DRB1 | 11  | 0   | 11  | 0.69%  |
| DRB1*11:02:01  | DRB1 | 9   | 1   | 10  | 0.69%  |
| DRB3*01:01:02G | DRB3 | 32  | 386 | 418 | 50.25% |
| DRB3*02:02:01G | DRB3 | 47  | 308 | 355 | 41.44% |
| DRB3*03:01:01G | DRB3 | 28  | 48  | 76  | 7.75%  |
| DRB3*02:01:01G | DRB3 | 4   | 2   | 6   | 0.50%  |
| DRB4*03:01N    | DRB4 | 282 | 393 | 675 | 66.75% |
| DRB4*01:01:01G | DRB4 | 284 | 105 | 389 | 30.88% |
| DRB4*01:03:03  | DRB4 | 35  | 1   | 36  | 2.31%  |

734

<sup>A</sup>Total allele count in the study cohort (n = 800); <sup>B</sup>Allele frequency

735

736

737

**Table 2. Frequently detected anti-microbial antibody responses**

| <b>Species</b>                    | <b>Overall (%)</b> | <b>Female (%)</b> | <b>Male (%)</b> |
|-----------------------------------|--------------------|-------------------|-----------------|
| <i>Streptococcus pneumoniae</i>   | 95.9               | 96.1              | 95.5            |
| Rhinovirus B                      | 93.7               | 93.5              | 94.1            |
| Human herpesvirus 4               | 93.0               | 93.5              | 92.0            |
| <i>Staphylococcus aureus</i>      | 92.9               | 93.7              | 91.3            |
| Human herpesvirus 5               | 90.2               | 92.6              | 86.1            |
| Human herpesvirus 1               | 74.1               | 76.1              | 70.4            |
| Rhinovirus A                      | 73.8               | 70.6              | 79.4            |
| Human respiratory syncytial virus | 68.4               | 68.7              | 67.9            |
| Human adenovirus C                | 56.6               | 59.3              | 51.9            |
| <i>Mycoplasma pneumoniae</i>      | 53.8               | 53.0              | 55.1            |
| Human herpesvirus 6B              | 47.6               | 53.0              | 38.0            |
| Human parainfluenza virus 3       | 44.4               | 44.8              | 43.6            |
| Human herpesvirus 3               | 43.0               | 41.5              | 45.6            |
| Human herpesvirus 7               | 43.0               | 44.2              | 40.8            |
| Human herpesvirus 2               | 40.2               | 39.7              | 41.1            |
| Enterovirus B                     | 38.7               | 37.8              | 40.4            |
| Human herpesvirus 8               | 38.6               | 39.5              | 36.9            |
| Influenza A virus                 | 37.3               | 35.2              | 41.1            |
| Enterovirus A                     | 35.3               | 33.3              | 39.0            |
| Human metapneumovirus             | 34.7               | 34.2              | 35.5            |
| Enterovirus C                     | 30.2               | 29.4              | 31.7            |
| Influenza B virus                 | 29.9               | 26.0              | 36.9            |
| Vaccinia virus                    | 28.4               | 28.4              | 28.6            |
| Human coronavirus HKU1            | 25.9               | 25.8              | 26.1            |
| Norwalk virus                     | 25.6               | 29.2              | 19.2            |
| Human herpesvirus 6A              | 24.2               | 25.0              | 22.6            |
| Human adenovirus F                | 24.2               | 22.9              | 26.5            |
| Human adenovirus D                | 23.9               | 23.7              | 24.4            |
| <i>Helicobacter pylori</i>        | 19.5               | 20.5              | 17.8            |
| Cosavirus A                       | 15.2               | 15.9              | 13.9            |
| Influenza C virus                 | 14.5               | 15.5              | 12.9            |
| Hepatitis B virus                 | 14.4               | 14.3              | 14.6            |
| Rotavirus A                       | 14.4               | 14.1              | 15.0            |
| Alphapapillomavirus 10            | 14.4               | 17.0              | 9.8             |
| Cowpox virus                      | 14.2               | 15.1              | 12.5            |

|                                      |      |      |      |
|--------------------------------------|------|------|------|
| Adeno-associated dependoparvovirus A | 12.8 | 11.4 | 15.3 |
| Human adenovirus B                   | 12.7 | 11.9 | 13.9 |
| Human parvovirus B19                 | 12.7 | 12.9 | 12.2 |
| Alphapapillomavirus 9                | 12.5 | 12.5 | 12.5 |
| Sapporo virus                        | 12.3 | 11.5 | 13.6 |
| Human parainfluenza virus 1          | 10.8 | 11.5 | 9.4  |
| Aichivirus A                         | 10.3 | 9.0  | 12.5 |
| Human coronavirus NL63               | 8.9  | 9.2  | 8.4  |
| Human parainfluenza virus 2          | 7.8  | 8.2  | 7.0  |
| Human adenovirus E                   | 7.6  | 6.7  | 9.4  |
| Alphapapillomavirus 6                | 7.5  | 8.0  | 6.6  |
| Human adenovirus A                   | 6.9  | 6.3  | 8.0  |
| Human coronavirus 229E               | 5.6  | 4.3  | 8.0  |

---

738

739

740 **Table 3. Associations between zygosity in HLA class II genes and the antibody**  
741 **repertoire breadth of selected species**

| Explanatory variable <sup>A</sup> | Response variable <sup>B</sup>  | $-\log_{10}(P\text{-value})$ | Coefficient of association ( $\beta$ ) | 95% CI      |
|-----------------------------------|---------------------------------|------------------------------|----------------------------------------|-------------|
| DRB1 zygosity                     | <i>Streptococcus pneumoniae</i> | 42.5                         | 2.01                                   | 1.73 - 2.30 |
| DRB1 zygosity                     | <i>Staphylococcus aureus</i>    | 20.3                         | 1.51                                   | 1.19 - 1.82 |
| DRB1 zygosity                     | Human herpesvirus 5             | 10.6                         | 1.00                                   | 0.71 - 1.30 |
| DRB1 zygosity                     | Human herpesvirus 4             | 10.2                         | 1.39                                   | 0.98 - 1.81 |
| DRB1 zygosity                     | Rhinovirus B                    | 26.8                         | 1.34                                   | 1.10 - 1.59 |
| DRB1 zygosity                     | Rhinovirus A                    | 25.9                         | 1.06                                   | 0.87 - 1.26 |
| DRB1 zygosity                     | Human adenovirus C              | 22.1                         | 0.89                                   | 0.72 - 1.07 |
| DRB1 zygosity                     | Human herpesvirus 6B            | 18.4                         | 0.78                                   | 0.61 - 0.95 |

742 <sup>A</sup> Zygosity in HLA-DRB1, -DPA1, -DPB1, -DQA1, and -DQB1 were used as explanatory variables. Only results with a significant  
743 association ( $P\text{-value} \leq 0.0001$ ) are shown; <sup>B</sup> The adjusted species score values (response variables) served as a measure of the  
744 antibody repertoire breadth in the selected species.

745

746 **Figures**

747

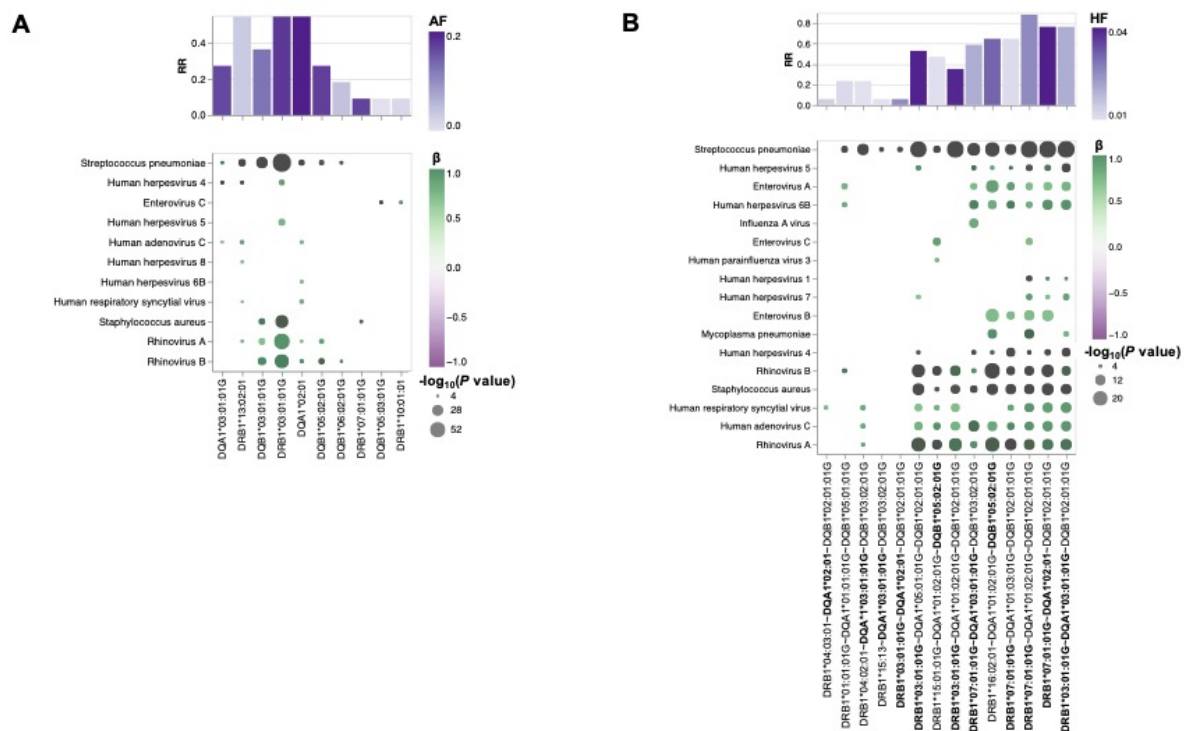

748

749

750 **Figure 1. HLA class II allele-specific and HLA-DQA1~DQB1~DRB1 haplotype-specific**  
 751 **effects on the antibody repertoire breadth against common microbial infections. A, B,**  
 752 **Heatmap plots depicting significant associations ( $P < 0.0001$ ) between specific alleles (A) or**  
 753 **haplotypes (B) and the antibody repertoire breadth against common microbial infections. The**  
 754 **coefficient ( $\beta$ ) and direction of associations are indicated by a color gradient for each circle.**  
 755 **The circle size depicts the  $-\log_{10}(P\text{-value})$  of the association. Alleles for which significant**  
 756 **associations were independently identified as shown in (A) are labeled in bold in (B). Bar plots**  
 757 **depict the anti-microbial response ratio (RR) for each allele or haplotype. The allele or**  
 758 **haplotype frequency is indicated by a color gradient for each bar.**

759

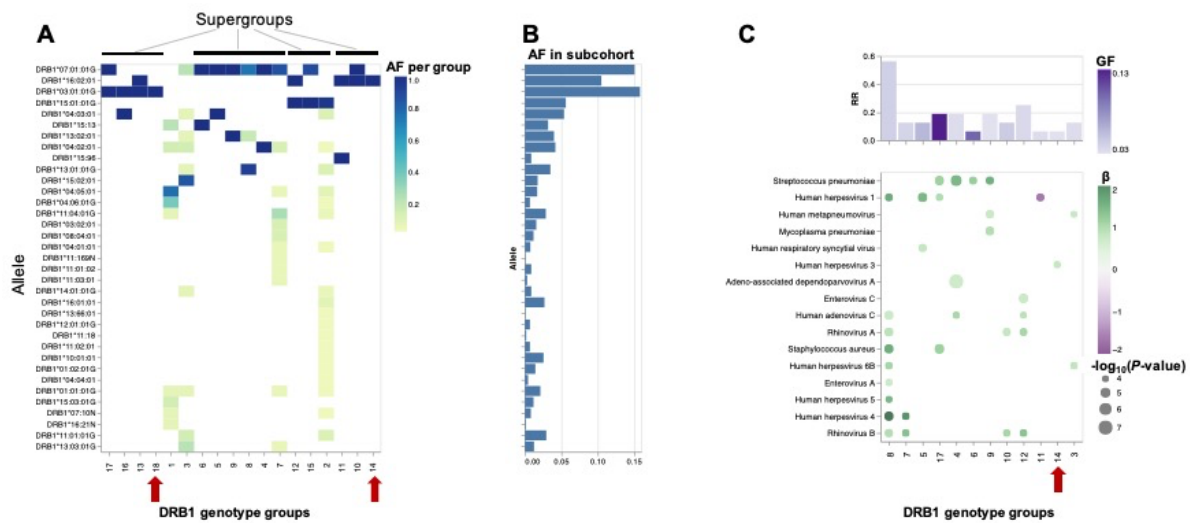

760

761

762 **Figure 2. HLA-DRB1 genotype-specific effects on the antibody repertoire breadth against**

763 **common microbial infections. A, Heatmap plot depicting the HLA-DRB1 allele frequency**

764 **per HLA-DRB1 group. B, Bar plot depicting the allele frequency across all individuals**

765 **assigned to one of eighteen HLA-DRB1 groups (n = 357). C, Heatmap plot depicting**

766 **significant associations ( $P < 0.0001$ ) between specific HLA-DRB1 genotype groups and the**

767 **antibody repertoire breadth against common microbial infections. The coefficient ( $\beta$ ) and**

768 **direction of association is indicated by a color gradient for each circle. The circle size depicts**

769 **the  $-\log_{10}(P\text{-value})$  of the association. Bar plot depicts the anti-microbial response ratio (RR)**

770 **for each HLA-DRB1 group. The genotype frequency (GF) is indicated by a color gradient for**

771 **each bar. Groups with HLA-DRB1 homozygotes are indicated by an arrow.**

772

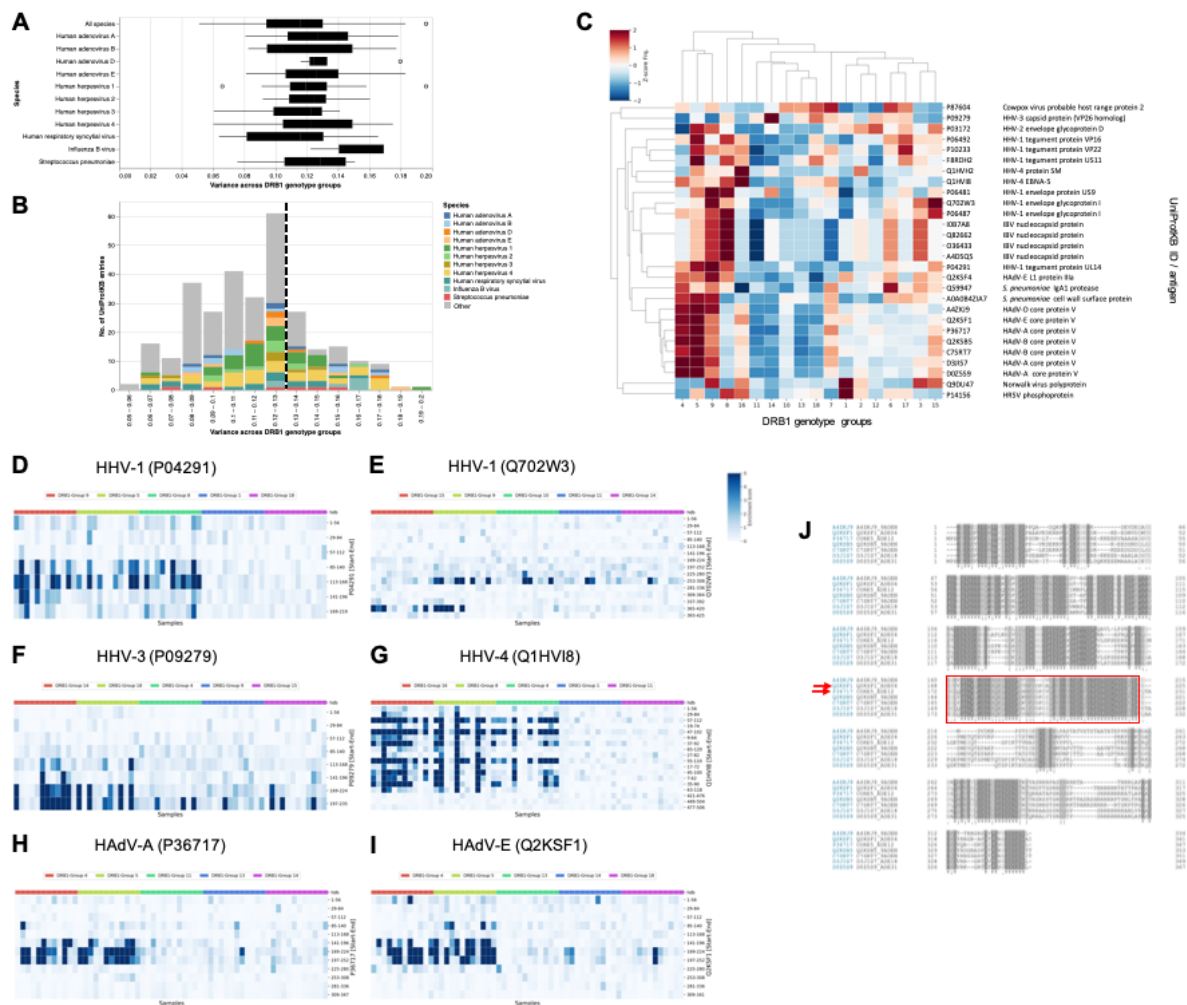

773

774

775 **Figure 3. Differential enrichment analysis of antigenic peptide-antibody interactions**

776 **among different HLA-DRB1 groups. A, Boxplot illustrating the distribution of variance in**

777 **the mean peptide enrichment frequency per UniProtKB entry of all, or selected, microbial**

778 **species, and across different HLA-DRB1 genotype groups. B, Histogram of variance in the**

779 **mean peptide enrichment frequency per UniProtKB entry, as shown in (A). High variance**

780 **captures protein antigens of microbial species that exhibit a comparatively different peptide**

781 **enrichment profile across HLA-DRB1 genotype groups. The dashed line in (B) indicates the**

782 **boundary of the upper 25<sup>th</sup> percentile (variance  $\geq 0.13$ ). UniProtKB entries for which the**

783 **antibody-antigen interactions showed the highest variance across different DRB1 groups were**



784 color-coded by species. **C**, Heatmap plot showing the antibody binding profile of selected  
785 microbial antigens across different HLA-DRB1 groups, with hierarchical clustering. Each row  
786 is a protein (UniProtKB entry) with a variance  $\geq 0.13$  in the mean peptide enrichment frequency  
787 as shown in **(B)**; each column represents a HLA-DRB1 genotype group. The color gradient  
788 represents the mean enrichment score (Z-score) of antigenic peptides per protein antigen and  
789 HLA-DRB1 genotype group. **D-I**, Comparative antigenicity profiles of selected microbial  
790 antigens across DRB1 genotype groups. Only representative DRB1 genotype groups with high  
791 variance in the Z-score values are shown. In the heatmap plots, each row is a peptide tiling  
792 across the indicated protein; each column represents a random sample of the selected DRB1  
793 genotype groups (10 samples per group are shown). Individuals of the same group are indicated  
794 with a color bar (top). The color intensity of each cell corresponds to the  $-\log_{10}(P\text{-value})$ , which  
795 was used as a measure of enrichment for a peptide in a sample. Greater values indicate stronger  
796 antibody responses; a  $-\log_{10}(P\text{-value}) \geq 2.3$  was considered to indicate statistical significance.  
797 **J**, Multiple sequence alignment (Clustal Omega) of the L2 gene products (Core protein V) of  
798 different HAdV species shown in **(C)**. Red arrows and the box indicate the UniProtKB entries  
799 and antigenic region corresponding to the peptide tiles with strong antibody responses shown  
800 in **(H)** and **(I)**.
